# Supplementary material for: Inhibition of the IL-17A axis Protects against Immune-related Adverse Events while Supporting Checkpoint Inhibitor Anti-tumor Efficacy
Source: Research Square preprint supplement (doi:10.21203/rs.3.rs-609476/v1), 2021-06-30
Supplement: Supplementary file 1 [file 6664786cd27ffea437675c2c.xlsx]

## Sheet: CXCL pathway
Cell Chat
Species:	Mouse
Pathway:	CXCL
	interaction_name	ligand	receptor	annotation
1	CXCL1_CXCR1	Cxcl1	Cxcr1	Secreted Signaling
2	CXCL5_CXCR1	Cxcl5	Cxcr1	Secreted Signaling
3	CXCL2_CXCR1	Cxcl2	Cxcr1	Secreted Signaling
4	CXCL3_CXCR1	Cxcl3	Cxcr1	Secreted Signaling
5	CXCL1_CXCR2	Cxcl1	Cxcr2	Secreted Signaling
6	CXCL5_CXCR2	Cxcl5	Cxcr2	Secreted Signaling
7	CXCL2_CXCR2	Cxcl2	Cxcr2	Secreted Signaling
8	CXCL3_CXCR2	Cxcl3	Cxcr2	Secreted Signaling
9	PPBP_CXCR2	Ppbp	Cxcr2	Secreted Signaling
10	CXCL4_CXCR3	Pf4	Cxcr3	Secreted Signaling
11	CXCL9_CXCR3	Cxcl9	Cxcr3	Secreted Signaling
12	CXCL10_CXCR3	Cxcl10	Cxcr3	Secreted Signaling
13	CXCL11_CXCR3	Cxcl11	Cxcr3	Secreted Signaling
14	CXCL13_CXCR3	Cxcl13	Cxcr3	Secreted Signaling
15	PF4_CXCR3	Pf4	Cxcr3	Secreted Signaling
16	CXCL12_CXCR4	Cxcl12	Cxcr4	Secreted Signaling
17	CXCL12_ACKR3	Cxcl12	Ackr3	Secreted Signaling
18	CXCL13_CXCR5	Cxcl13	Cxcr5	Secreted Signaling
19	CXCL16_CXCR6	Cxcl16	Cxcr6	Secreted Signaling
20	CXCL1_ACKR1	Cxcl1	Ackr1	Secreted Signaling
21	CXCL2_ACKR1	Cxcl2	Ackr1	Secreted Signaling
22	CXCL3_ACKR1	Cxcl3	Ackr1	Secreted Signaling
23	CXCL5_ACKR1	Cxcl5	Ackr1	Secreted Signaling
24	CXCL9_ACKR1	Cxcl9	Ackr1	Secreted Signaling
25	CXCL10_ACKR1	Cxcl10	Ackr1	Secreted Signaling
26	CXCL11_ACKR1	Cxcl11	Ackr1	Secreted Signaling
27	CXCL11_ACKR3	Cxcl11	Ackr3	Secreted Signaling
28	CXCL13_ACKR1	Cxcl13	Ackr1	Secreted Signaling

## Sheet: CCL pathway
Cell Chat
Species:	mouse
Pathway:	CCL
	interaction_name	ligand	receptor	annotation
1	CCL5_CCR1	Ccl5	Ccr1	Secreted Signaling
2	CCL3_CCR1	Ccl3	Ccr1	Secreted Signaling
3	CCL8_CCR1	Ccl8	Ccr1	Secreted Signaling
4	CCL9_CCR1	Ccl9	Ccr1	Secreted Signaling
5	CCL6_CCR1	Ccl6	Ccr1	Secreted Signaling
6	CCL7_CCR1	Ccl7	Ccr1	Secreted Signaling
7	CCL5_CCR1L1	Ccl5	Ccr1l1	Secreted Signaling
8	CCL3_CCR1L1	Ccl3	Ccr1l1	Secreted Signaling
9	CCL8_CCR1L1	Ccl8	Ccr1l1	Secreted Signaling
10	CCL9_CCR1L1	Ccl9	Ccr1l1	Secreted Signaling
11	CCL6_CCR1L1	Ccl6	Ccr1l1	Secreted Signaling
12	CCL7_CCR1L1	Ccl7	Ccr1l1	Secreted Signaling
13	CCL8_CCR2	Ccl8	Ccr2	Secreted Signaling
14	CCL6_CCR2	Ccl6	Ccr2	Secreted Signaling
15	CCL7_CCR2	Ccl7	Ccr2	Secreted Signaling
16	CCL2_CCR2	Ccl2	Ccr2	Secreted Signaling
17	CCL12_CCR2	Ccl12	Ccr2	Secreted Signaling
18	CCL27A_CCR2	Ccl27a	Ccr2	Secreted Signaling
19	CCL27B_CCR2	Ccl27b	Ccr2	Secreted Signaling
20	CCL5_CCR3	Ccl5	Ccr3	Secreted Signaling
21	CCL6_CCR3	Ccl6	Ccr3	Secreted Signaling
22	CCL7_CCR3	Ccl7	Ccr3	Secreted Signaling
23	CCL11_CCR3	Ccl11	Ccr3	Secreted Signaling
24	CCL24_CCR3	Ccl24	Ccr3	Secreted Signaling
25	CCL26_CCR3	Ccl26	Ccr3	Secreted Signaling
26	CCL28_CCR3	Ccl28	Ccr3	Secreted Signaling
27	CCL27A_CCR3	Ccl27a	Ccr3	Secreted Signaling
28	CCL27B_CCR3	Ccl27b	Ccr3	Secreted Signaling
29	CCL17_CCR4	Ccl17	Ccr4	Secreted Signaling
30	CCL22_CCR4	Ccl22	Ccr4	Secreted Signaling
31	CCL5_CCR4	Ccl5	Ccr4	Secreted Signaling
32	CCL4_CCR5	Ccl4	Ccr5	Secreted Signaling
33	CCL5_CCR5	Ccl5	Ccr5	Secreted Signaling
34	CCL3_CCR5	Ccl3	Ccr5	Secreted Signaling
35	CCL8_CCR5	Ccl8	Ccr5	Secreted Signaling
36	CCL20_CCR6	Ccl20	Ccr6	Secreted Signaling
37	CCL19_CCR7	Ccl19	Ccr7	Secreted Signaling
38	CCL21A_CCR7	Ccl21a	Ccr7	Secreted Signaling
39	CCL21B_CCR7	Ccl21b	Ccr7	Secreted Signaling
40	CCL21C_CCR7	Ccl21c	Ccr7	Secreted Signaling
41	CCL19_ACKR4	Ccl19	Ackr4	Secreted Signaling
42	CCL21A_ACKR4	Ccl21a	Ackr4	Secreted Signaling
43	CCL21B_ACKR4	Ccl21b	Ackr4	Secreted Signaling
44	CCL21C_ACKR4	Ccl21c	Ackr4	Secreted Signaling
45	CCL1_CCR8	Ccl1	Ccr8	Secreted Signaling
46	CCL25_CCR9	Ccl25	Ccr9	Secreted Signaling
47	CCL25_ACKR4	Ccl25	Ackr4	Secreted Signaling
48	CCL28_CCR10	Ccl28	Ccr10	Secreted Signaling
49	CCL27A_CCR10	Ccl27a	Ccr10	Secreted Signaling
50	CCL27B_CCR10	Ccl27b	Ccr10	Secreted Signaling
51	CCL1_ACKR4	Ccl1	Ackr4	Secreted Signaling
52	CCL8_ACKR4	Ccl8	Ackr4	Secreted Signaling
53	CCL1_ACKR1	Ccl1	Ackr1	Secreted Signaling
54	CCL2_ACKR1	Ccl2	Ackr1	Secreted Signaling
55	CCL2_ACKR2	Ccl2	Ackr2	Secreted Signaling
56	CCL3_ACKR2	Ccl3	Ackr2	Secreted Signaling
57	CCL4_ACKR2	Ccl4	Ackr2	Secreted Signaling
58	CCL5_ACKR1	Ccl5	Ackr1	Secreted Signaling
59	CCL5_ACKR2	Ccl5	Ackr2	Secreted Signaling
60	CCL7_ACKR1	Ccl7	Ackr1	Secreted Signaling
61	CCL8_ACKR1	Ccl8	Ackr1	Secreted Signaling
62	CCL11_ACKR1	Ccl11	Ackr1	Secreted Signaling
63	CCL11_ACKR2	Ccl11	Ackr2	Secreted Signaling
64	CCL22_ACKR2	Ccl22	Ackr2	Secreted Signaling
65	CCL24_ACKR2	Ccl24	Ackr2	Secreted Signaling
66	CCL26_ACKR2	Ccl26	Ackr2	Secreted Signaling
67	CCL17_ACKR1	Ccl17	Ackr1	Secreted Signaling
68	CCL17_ACKR2	Ccl17	Ackr2	Secreted Signaling
Showing 1 to 68 of 68 entries
Previous1Next
