# Supplementary material for: Inhibition of the IL-17A axis Protects against Immune-related Adverse Events while Supporting Checkpoint Inhibitor Anti-tumor Efficacy
Source: Research Square preprint supplement (doi:10.21203/rs.3.rs-609476/v1), 2021-06-30
Supplement: Supplementary file 1 [file c3c5d575e83eb7cb0262de89.pdf]

## Lechner *et al.* Supplemental Methods

### Anti-mouse antibodies used in flow cytometry experiments.

| Target | clone    | Source      | Working Dilution | Fluorophore | Catalog number |
|--------|----------|-------------|------------------|-------------|----------------|
| CD4    | RM4-5    | Invitrogen  | 1:50             | FITC        | 11-0042-85     |
| CD3    | 145-2C11 | Invitrogen  | 1:50             | APC         | 17-0031-82     |
| CD8    | 53-6.7   | Invitrogen  | 1:50             | APC         | 17-0081-82     |
| RORC   | AFKJS-9  | eBioscience | 1:50             | APC         | 17-6988-82     |
| IL-17A | eBio17B7 | Invitrogen  | 1:50             | PE          | 12-7177-81     |
| CD11c  | N418     | Invitrogen  | 1:50             | PE          | 12-0114-82     |
| CD11b  | M1/70    | Invitrogen  | 1:50             | APC         | 17-0112-82     |
| F4/80  | BM8      | Invitrogen  | 1:50             | PE          | 12-4801-80     |
| B220   | RA3-6B2  | eBioscience | 1:50             | e450        | 48-0452-82     |
| Nkp46  | 29A1.4   | Invitrogen  | 1:50             | PeCy7       | 25-3351-82     |
| IFNg   | XMG1.2   | Biolegend   | 1:50             | APC         | 505810         |
| CD44   | IM7      | ebioscience | 1:50             | PeCy7       | 25-0441-82     |
| TCRgd  | GL3      | eBioscience | 1:50             | e450        | 48-5711-82     |
| CD45   | 30-F11   | Biolegend   | 1:50             | PerCP Cy5.5 | 103132         |
| CD45   | 30-F11   | Invitrogen  | 1:50             | SB600       | 63-0451-82     |
| CD45   | 30-F11   | Invitrogen  | 1:50             | PE          | 12-0451-82     |
| CD27   | LG.3A10  | Biolegend   | 1:50             | APC         | 124212         |
| CD27   | LG.3A10  | Biolegend   | 1:50             | PerCP Cy5.5 | 124214         |

**Anti-human antibodies used in flow cytometry experiments.**

| Target | clone       | Source     | Working Dilution | Fluorophore | Catalog number |
|--------|-------------|------------|------------------|-------------|----------------|
| CD3    | SK7         | Invitrogen | 1:50             | PeCy5.5     | 35-0036-42     |
| CD4    | RPA-T4      | Invitrogen | 1:50             | e450        | 48-0049-42     |
| CD8    | RPA-T8      | Invitrogen | 1:50             | APC         | BDB555369      |
| TCRgd  | B1.1        | Invitrogen | 1:50             | FITC        | 11-9959-42     |
| IL-17A | eBio64DEC17 | Invitrogen | 1:50             | PE          | 12-7179-42     |

**Taqman probes used in qRT-PCR experiments.**

| Gene    | Species | Probe (Assay ID) | Source           |
|---------|---------|------------------|------------------|
| GAPDH   | mouse   | Mm99999915_g1    | Thermo<br>Fisher |
| IL-17A  | mouse   | Mm00439618_m1    | Thermo<br>Fisher |
| IL-17F  | mouse   | Mm00521423_m1    | Thermo<br>Fisher |
| IL-1b   | mouse   | Mm00434228_m1    | Thermo<br>Fisher |
| IL-6    | mouse   | Mm00446190_m1    | Thermo<br>Fisher |
| TNFa    | mouse   | Mm00443258_m1    | Thermo<br>Fisher |
| Tgfb1   | mouse   | Mm01178820_m1    | Thermo<br>Fisher |
| RORC    | mouse   | Mm01261022_m1    | Thermo<br>Fisher |
| IL23R   | mouse   | Mm00519943_m1    | Thermo<br>Fisher |
| IFNG    | mouse   | Mm01168134_m1    | Thermo<br>Fisher |
| CD3e    | mouse   | Mm00599683_m1    | Thermo<br>Fisher |
| ptprc   | mouse   | Mm01293577_m1    | Thermo<br>Fisher |
| GAPDH   | human   | Hs02786624_g1    | Thermo<br>Fisher |
| IL-17RC | human   | Hs00994312_g1    | Thermo<br>Fisher |
